# Supplementary material
Source: PubMed Central journal article supplement (PMC3203802)
Supplement: 1108482108_pnas.201108482SI.pdf [file 1108482108_pnas.201108482SI.pdf]

# Supporting Information

Zammarchi et al. 10.1073/pnas.1108482108

## SI Materials and Methods

**STAT3 Minigene Construction.** Human genomic DNA (Promega) was amplified by Platinum Pfx (Invitrogen) as per instructions for 35 cycles with an annealing temperature of 60 °C and a 3-min extension time using STAT3-specific primers (I22F and I24R) with overhanging restriction sites for KpnI and BamHI (Promega), respectively. The amplified region spans the entire exon 22 (43 nt), intron 22 (280 nt), exon 23 (113 nt), intron 23 (988 nt), and 985 nt of exon 24, which include the full-length stop codon at position 56 of the exon. The entire exon 24, including the full UTR, is 2,477-nt long. The resulting PCR product was subcloned into pcDNA3.1+ (Invitrogen). The ligation reaction was used to transform MAX Efficiency DH5a-competent cells, and colony PCR was used to screen for positive colonies that were then grown overnight at 37 °C. Plasmid DNA was prepared (Qiagen) and the resulting vector was confirmed by restriction enzyme digestion and sequencing.

**Primer Sequences for STAT3 Minigene Construction.** Introns 22F (I22F) 5'-CGACGGTACCTCCAGCTCTGCTTACTGAATGC-GA-3'

Introns 24R (I24R) 5'-CGGTGGATCCGCTTAAAGCAC-CAAGGAGGCTGTT-3'

**Minigene Mutant Construction.** Mutants were prepared by site-specific mutagenesis using overlap extensions (1). Briefly, complementary PCR primers forward mutant (FM) and reverse mutant (RM) were designed to have either a deletion or a point mutation within the primer, flanked by at least 14 bp on each side. Two PCR reactions were performed using the FM with I24R reverse primer and RM with I22F forward primer. The resulting PCR products were gel-purified, and equal amounts were used as a template for a second PCR, with I22F and I24R primers. All PCR was performed with Platinum Pfx (Invitrogen), with an annealing temperature of 60 °C and an extension time 1 min/kb as per instructions. The resulting products were then subcloned as previously described and verified by sequencing.

**Primer Sequences for STAT3 Minigene Deletion Mutants in WT Context.**

ΔA-F 5'-CTGCCCCCATTTCCTACAGAAGCAATACCAT-TGACCTGCCGATG-3'  
ΔA-R 5'-CATCGGCAGGTCAATGGTATTGCTTCTGTAG-GAAATGGGGGGCAG-3'  
ΔB-F 5'-CCCCATTTCCTACAGAACGACCACCATTGAC-CTGCCGATGTCC-3'  
ΔB-R 5'-GGACATCGGCAGGTCAATGGTGGTCTGTTCT-GTAGGAAATGGGG-3'  
ΔC-F 5'-CATTTTCCTACAGAACGACCTGCAGCGACCTG-CCGATGTCCCC-3'  
ΔC-R 5'-GGGACATCGGCAGGTCTGCTGCAGGTCTGTT-CTGTAGGAAATG-3'  
ΔD-F 5'-CTACAGAACGACCTGCAGCAATACCCCGATG-TCCCCCGC-3'  
ΔD-R 5'-GCGGGGGGACATCGGGGTATTGCTGCAGG-TCGTTCTGTAG-3'  
ΔE-F 5'-ACGACCTGCAGCAATACCATTGACTCCCCC-GCACTTTAGATTCATTGATG-3'  
ΔE-R 5'-CATCAATGAATCTAAAGTGCGGGGGGAGTC-AATGGTATTGCTGCAGGTCGT-3'  
ΔF-F 5'-GCAGCAATACCATTGACCTGCCCGCACTTT-AGATTCATTGATGCAGTTTGGA-3'

ΔF-R 5'-TCCAACTGCATCAATGAATCTAAAGTGCG-CGGCAGGTCAATGGTATTGCTGC-3'  
ΔG-F 5'-AATACCATTGACCTGCCGATGTCCTTAGAT-TCATTGATGCAGTTTGAAATAATGGTGAA-3'  
ΔG-R 5'-TTCACCATTATTTCCAAAGTGCATCAATGAA-TCTAAGGACATCGGCAGGTCAATGGTATT-3'  
ΔA1-F 5'-CTGCCCCCATTTCCTACAGAACCTGCAGC-AATACCATTGACCTG-3'  
ΔA1-R 5'-CAGGTCAATGGTATTGCTGCAGGTTCTGT-AGGAAATGGGGGGCAG-3'  
ΔA2-F 5'-TGCCCCCATTTCCTACAGAACGTGCAGCA-ATACCATTGACCTGCC-3'  
ΔA2-R 5'-GGCAGGTCAATGGTATTGCTGCACGTTCTG-TAGGAAATGGGGGGCA-3'  
ΔA3-F 5'-GCCCCCATTTCCTACAGAACGACCAGCAA-TACCATTGACCTGCCGATG-3'  
ΔA3-R 5'-CATCGGCAGGTCAATGGTATTGCTGGTTCG-TTCTGTAGGAAATGGGGGGC-3'  
ΔB2-F 5'-CCCATTTCCTACAGAACGACCTGCAATACC-ATTGACCTGCCGATGTCCC-3'  
ΔB2-R 5'-GGGACATCGGCAGGTCAATGGTATTGCAG-GTCGTTCTGTAGGAAATGGG-3'  
ΔB3-F 5'-CATTTCCTACAGAACGACCTGCAGCACCAT-TGACCTGCCGATGTCC-3'  
ΔB3-R 5'-GGACATCGGCAGGTCAATGGTGTCTGCAGG-TCGTTCTGTAGGAAATG-3'  
ΔH-F 5'-GCCGATGTCCCCCGCACTTTAGAGTTTGGA-AATAATGGTGAAGGTGCTGAACCC-3'  
ΔH-R 5'-GGGTTGAGCACCCTTACCATTATTTCAAAC-TCTAAAGTGGGGGGCAGTCCG-3'  
ΔK-F 5'-CCCCCGCACTTTAGATTCATTGATTAATGG-TGAAGGTGCTGAACCCCTC-3'  
ΔK-R 5'-GAGGGTTCAGCACCTTACCATTAAATCAATG-AATCTAAAGTGCGGGG-3'  
ΔL-F 5'-CGCACTTTAGATTCATTGATGCAGTTTGAG-GTGCTGAACCCCTCAGCAG-3'  
ΔL-R 5'-CTGCTGAGGGTTCAGCACCTCCAAACTGCA-TCAATGAATCTAAAGTGCG-3'  
ΔM-F 5'-GCACCTTTAGATTCATTGATGCAGTTTGAA-ATAATGGACCCTCAGCAGGAGGGC-3'  
ΔM-R 5'-GCCCTCTGCTGAGGGTCCATTATTTCAA-ACTGCATCAATGAATCTAAAGTGC-3'  
ΔN-F 5'-GATGCAGTTTGAAATAATGGTGAAGGTGC-AGGAGGGCAGTTTGTTGAGTATTTG-3'  
ΔN-R 5'-CAAATACTACCAAACCTGCCCTCCTGCACCT-TCACCATTATTTCCAAACCTGCATC-3'  
ΔO-F 5'-GAAATAATGGTGAAGGTGCTGAACCCCTCG-TTTGGTGAATTTGGTTGACAGACTTTGTC-3'  
ΔO-R 5'-GACAAAGTCTGTCAACCAAATACTACCAA-ACGAGGGTTCAGCACCTTACCATTATTTC-3'  
ΔH1-F 5'-CCGCACTTTAGAAATTGATGCAGTTTGGA-3'  
ΔH1-R 5'-TTCCAAACTGCATCAATTCTAAAGTGCGG-3'  
ΔH2-F 5'-CCGCACTTTAGATTCGATGCAGTTTGGA-3'  
ΔH2-R 5'-TCCAAACTGCATCGAATCTAAAGTGCGG-3'  
ΔH3-F 5'-CCGCACTTTAGATTCATTGCAAGTTTGGA-3'  
ΔH3-R 5'-TTCCAAACTGCATGAATCTAAAGTGCGG-3'  
ΔK1-F 5'-CCGCACTTTAGATTCATTGATGTTTGAAA-TAATGG-3'  
ΔK1-R 5'-CCATTATTTCCAAACATCAATGAATCTAAA-GTGCGG-3'  
ΔK2-F 5'-CCGCACTTTAGATTCATTGATGCATGGAAA-TA-3'

ΔK2-R 5'-TATTTCCATGCATCAATGAATCTAAAGTGC-  
 GG-3'  
 ΔK3-F 5'-CGCACTTTAGATTCATTGATGCAGTTAAATA-  
 ATGGTG-3'  
 ΔK3-R 5'-CACCATTATTTAACTGCATCAATGAATCTA-  
 AAGTGC-3'  
 Py<sup>+</sup>-F 5'-ATGTCCCCCTCCCTTTAGATTCATTG-3'  
 Py<sup>-</sup>-R 5'-CAATGAATCTAAAGGGAGGGGGGACAT-3'

**Transfection of Minigenes.** Minigene transfections into HeLa cells were done with FuGENE 6 (Roche) as per instructions. Twenty-four hours after transfection, cells were collected for RNA extraction.

**RNA Extraction and RT-PCR.** Total RNA was extracted using either the RNAqueous Kit (Ambion) (for cell lines) or TRIzol reagent (Invitrogen) (for tumor samples) according to the manufacturers' instructions. Contaminating DNA was removed using TURBO DNA-free (Ambion) following product instruction. Total RNA was then reverse-transcribed with SuperScript III RT (Invitrogen) and the resulting cDNA was used as template for PCR analysis. All PCR reactions were performed with Platinum Taq (Invitrogen) as per instructions with an annealing temperature of 60 °C and an extension time of 30 s for a total of 30 cycles.

Primers used to amplify STAT3 and GAPDH were as follows.

**STAT3  $\alpha/\beta$  splicing (minigene).**

Forward 5'-GCTAGCGTTTAAACTTAAGCTTGG-3'  
 Reverse 5'-ACTCCGAGGTCAACTCCATGTCAA-3'

**STAT3  $\alpha/\beta$  splicing (endogenous).**

Forward 5'-TGTTACCAATATCCTGGTGTCTCC-3'  
 Reverse 5'-ACTCCGAGGTCAACTCCATGTCAA-3'

**STAT3 exon 6 skipping.**

Forward 5'-TGGTGACGGAGAAGCAGCAGAT-3'  
 Reverse 5'-TGCACGTACTCCATCGCTGACAAA-3'

**GAPDH primers.**

F 5'-TGCACCACCAACTGCTTAGC-3'  
 R 5'-GGCATGGACTGTGGTCATGAG-3'

**Cell Culture.** MDA-MB-435s, MDA-MB-468, MDA-MB-453, HeLa, A549, DU145, K562, 4T1, and B16 cells were purchased from the American Type Culture Collection. Phoenix-Ampho packaging cells were a generous gift of Scott Lowe (Cold Spring Harbor Laboratory, Cold Spring Harbor, NY). Human breast cancer cell lines were grown in a mixture (1:1, vol/vol) of DMEM and Ham's F-12 medium supplemented with 1% nonessential amino acids (Invitrogen), 1% sodium pyruvate (Invitrogen), 1% penicillin/streptomycin (Invitrogen), and 10% FBS (Sigma). HeLa and Phoenix-Ampho cells were grown in DMEM supplemented with 1% penicillin/streptomycin (Invitrogen) and 10% FBS (Sigma). A549, DU145, K562, 4T1, and B16 were grown in RPMI 1640 media supplemented with 1% penicillin/streptomycin (Invitrogen) and 10% FBS (Sigma). Cells were incubated at 37 °C in a 5% CO<sub>2</sub> atmosphere.

**Antibodies.** Total-STAT3 (Cell Signaling; 9132), phospho-STAT3 Y705 (Cell Signaling; 9131), total-STAT1 (BD Biosciences; 610115), lens epithelium-derived growth factor (LEDGF) (BD Biosciences; 611714), peroxisomal biogenesis factor 1 (PEX1) (BD Biosciences; 611719), p300/CBP-associated factor (PCAF) (Cell Signaling; 3378),  $\alpha$ -tubulin (Sigma; T5168), and actin (Sigma; A4700).

**Western Blot.** Whole-cell lysates were prepared using M-PER protein extraction buffer (Thermo Scientific) with Complete Protease Inhibitor Mixture (Roche) as per instructions. Protein concentration was determined using the Bradford assay (Bio-Rad). Samples were subjected to an 8% SDS/PAGE, transferred to an Immobilon-FL PVDF membrane (Millipore), and blotted in

5% milk for 2 h at room temperature. Blots were incubated overnight at 4 °C with the respective primary antibodies. Next, the blots were washed, incubated with the corresponding HRP-conjugated secondary antibody, washed again, and detected using SuperSignal West Femto Substrate (Pierce).

**Morpholino Treatments.** Morpholino oligos (Gene Tools) were mixed at the desired concentration with media plus 4% FBS and added to the cells. Endo-Porter (Gene Tools) was used as delivery reagent at a final concentration of 6  $\mu$ M.

Vivo-Morpholino oligos (2) were either intratumorally injected at a final concentration of 0.12 mg/30  $\mu$ l or administered intravenously at 15 mg/kg. Treatments were administered twice a week for either 1 or 3 wk.

Sequences of morpholinos were as follows.

ST1, 5'-CTGCAGGTCGTTCTGTAGGAAAT-3'  
 ST2, 5'-ATTGCTGCAGGTCGTTCTGTAGG-3'  
 ST3, 5'-GGTATTGCTGCAGGTCGT-3'  
 ST6, 5'-CATTTTCTGTTCTAGATCCTGTT-3'  
 ST7, 5'-TTCACCTGCCTCCTTGACTCTTG-3'  
 INV, 5'-GGATGTCTTGCTGGACGTCGTTA-3'

**Small Interfering RNA.** Oligofectamine (Invitrogen) was used to transfect siRNA into MDA-MB-435s cells as per instructions. siRNAs were purchased from the HTSCF (High-Throughput Screening Core facility) (Memorial Sloan-Kettering Cancer Center). As a control, we used an siRNA oligo directed against GFP. siRNAs against PEX1, PCAF, and CyclinC (CCNC) were used at a final concentration of 100 nM each and compared with MDA-MB-435s cells treated with 100 nM GFP siRNA oligo. siRNA against LEDGF was used at a final concentration of 50 nM and compared with MDA-MB-435s cells treated with 50 nM GFP siRNA oligo. Each treatment was done in triplicate. Cells were treated for 72 h and then collected for quantitative (q)PCR/Western blot and trypan blue analysis.

**Trypan Blue.** Cells were treated with either the morpholino oligos or with the siRNA oligos as described above. At the end of the treatment, cells were trypsinized, counted with a hemocytometer, and scored as dead/total. Data were analyzed by calculating the fold change in dead/total cells compared with the control treatment.

**Apoptosis and Cell-Cycle Analysis.** Apoptosis was determined by annexin V/propidium iodide (AnxV/PI) staining. Cells ( $1 \times 10^5$ ) were resuspended in AnxV/PI buffer (Annexin V Binding Buffer; Biolegend). Alexa Fluor 647-conjugated annexin V (Biolegend) was added to the cell suspension and incubated for 15 min at room temperature. Cells were further resuspended in AnxV/PI buffer, and PI (Sigma-Aldrich; 1  $\mu$ g/mL) was added before flow analysis by Beckman Coulter cyan flow cytometer.

For cell-cycle analysis, harvested cells ( $5 \times 10^5$ ) were washed twice with PBS + 0.5% BSA and fixed in cold 70% (vol/vol) ethanol for 30 min. Cells were then washed twice and further treated with RNase (100  $\mu$ g/mL; Sigma-Aldrich) and PI (50  $\mu$ g/mL). Samples were incubated at 37 °C for 15 min and analyzed by flow cytometry. Data were analyzed using FlowJo software (Tree Star).

**ELISA.** IL8 levels in MDA-MB-435s supernatants were measured with an IL8 ELISA Kit (Quantikine; R&D Systems) according to the manufacturer's protocol.

**Cell Proliferation Assay.** Cells were plated in 96-well plates for 24 h and then treated with either 1  $\mu$ M pan-Jak inhibitor P6 (a tetracyclic pyridone; 2-tert-butyl-9-fluoro-3,6-dihydro-7H-benz[h]-imidaz[4,5-f]isoquinoline-7-one, pyridone 6) (3) or DMSO in association with 6  $\mu$ M Vivo-Morpholino control oligonucleotide

inverted sequence (INV) or with just 6  $\mu$ M Vivo-Morpholino oligonucleotides INV, ST2, and ST6 for 48 h. A CellTiter 96 AQueous One Solution Cell Proliferation Assay (Promega) was performed according to the manufacturer's instructions. Absorbance was measured at 490 nm using a microplate reader (Bio-Rad).

**TUNEL.** TUNEL assay was carried out according to the manufacturer's instructions (Roche).

**Immunohistochemistry.** Immunohistochemical staining was carried out on 5- $\mu$ m sections from formalin-fixed, paraffin-embedded tumor specimens. Following routine deparaffinization and rehydration, the sections were subjected to staining with phospho-STAT3 (Y705; Cell Signaling, 9131; S727; Epitomics, 1121-1), total-STAT3 (Cell Signaling; 9132), and caspase 3 (Cell Signaling; 9661) antibodies using the automated staining processor Discovery from Ventana Medical Systems.

**Quantification of Immunohistochemical Staining.** TUNEL and cleaved caspase 3-stained cells were estimated in 10 randomly selected fields of tumor at 40 $\times$  magnification, and the percentage of positive tumor cells was calculated as number of positive cells/total number of cells  $\times$  100.

**Affymetrix Oligonucleotide Microarray.** MDA-MB-435s cells were treated with 16  $\mu$ M ST2, ST6, or INV morpholino for 4 d and total RNA was extracted at the end of treatment. The quality of the RNA was ensured before labeling by analyzing 20–50 ng of each sample using the RNA 6000 NanoAssay and a Bioanalyzer 2100 (Agilent). Samples with a 28S:18S ribosomal peak ratio of 1.8–2.0 were considered suitable for labeling. For samples meeting this standard, 2  $\mu$ g of total RNA was used for cDNA synthesis using an oligo (dT)-T7 primer and the SuperScript Double-Stranded cDNA Synthesis Kit (Invitrogen). Synthesis, linear amplification, and labeling of cRNA were accomplished by transcription *in vitro* using the MessageAmp aRNA Kit (Ambion) and biotinylated nucleotides (Enzo Diagnostics). Ten micrograms of labeled and fragmented cRNA was then hybridized to the mouse genome U133 plus 2.0 array (Affymetrix), which interrogates  $\sim$ 39,000 transcripts, at 45  $^{\circ}$ C for 16 h. Automated washing and staining were performed using the Affymetrix Fluidics Station 400 according to the manufacturer's protocols. Finally, chips were scanned with a high-numerical aperture and flying objective lens in the GS3000 scanner (Affymetrix). Raw expression data were analyzed using GCOS 1.4 (Affymetrix). Data were normalized to a target intensity of 500 to account for differences in global chip intensity.

**Real-Time Quantitative PCR.** Primers for qPCR were designed for use with an annealing temperature of 60  $^{\circ}$ C and a product size of less than 150 nucleotides through the oligo-design program at <http://www.idtdna.com>. When possible, primers were designed to span exon–exon junctions to prevent the amplification of contaminating genomic DNA. PCR reactions were performed per SYBR Green instructions (Invitrogen). Primers initially were tested for linearity with a template curve from 200 ng to 2 pg (10-fold dilutions) with retro-transcribed Universal Human RNA (Stratagene) and by checking the PCR product size on an agarose gel stained with ethidium bromide. A single gel band and a single peak on the melting curve were verified initially and used to confirm the PCR product thereafter. The ddC(t) method was used for qPCR determination (4). Hypoxanthine phosphoribosyl transferase (HPRT) and  $\beta$ -2-microglobulin (B2M) were used as housekeeping genes.

**Real-Time Primer Sequences.**

**EGR1.** F 5'-AGCCCTACGAGCACCTGAC-3'

R 5'-AGCGGCCAGTATAGGTGATG-3'  
**FAS.** F 5'-ATAAGCCCTGTCTCCAGGTGAAA-3'  
R 5'-ATTCTGGGTCCGGGTGCAGTTTAT-3'  
**Hsp27.** F 5'-AAGGATGGCGTGGTGGAGATCA-3'  
R 5'-TGATCTCGTTGGACTGCGTGGCTA-3'  
**SOCS3.** F 5'-GAAGATCCCCCTGGTGTGA-3'  
R 5'-TTCCGACAGAGATGCTGAAGAGT-3'  
**VEGF.** F 5'-TTTCTGCTGTCTTGGGTGCATTGG-3'  
R 5'-AAGATGTCCACCAGGGTCTCGATT-3'  
**IL8.** F 5'-AGAAACCACCGGAAGGAACCATCT-3'  
R 5'-AATTTCTGTGTTGGCGCAGTGTGG-3'  
**LEDGF.** F 5'-GTGTTTCAAAGGAAGATACCGACC-3'  
R 5'-TTGCTGTGTTGCTACTACTCTGCT-3'  
**CCNC.** F 5'-CAAGATCTGTTGAAGGAGCGCCAA-3'  
R 5'-CTTGAATATACCGTAGCAGTGGC-3'  
**STAT1 $\beta$ .** F 5'-AGCCAATGCAACTTGATGGCCCTA-3'  
R 5'-TCAACAAGTTTCAAGCTGTGATGGCG-3'  
**PCAF.** F 5'-GGCAGACTTACAGCAGTCTTTACCA-3'  
R 5'-TTGCTTTAGGCACACTGCTGGTG-3'  
**PEX1.** F 5'-AGCTGCATGCTGTTTCCCTTGAAC-3'  
R 5'-TATTCTCTTTGGCTCGGCGTGTCT-3'  
**SURVIVIN.** F 5'-TTCGTCCGGTTGCGCTTCC-3'  
R 5'-TCGATGGCACGGCGCACTT-3'  
**B2M.** F 5'-GGCTATCCAGCGTACTCCAAA-3'  
R 5'-CGGCAGGCATACCTCTTTT-3'  
**HPRT.** F 5'-GACCAGTCAACAGGGGACAT-3'  
R 5'-AACACTTCGTGGGGTCTTTTC-3'

**Stable and Transient Overexpression.** STAT1 $\beta$ , PCAF, IL8, and CCNC full-length cDNAs were isolated by RT-PCR from MDA-MB-435s cells and subcloned into the retroviral vector pLPC (5). The pLPC vector is a retroviral expression vector with a puromycin resistance marker (a gift from S. Lowe, Cold Spring Harbor Laboratory, Cold Spring Harbor, NY). LEDGF cDNA was a generous gift of Marja Jäättelä Danish Cancer Society, Copenhagen, Denmark, and it was also subcloned into the retroviral vector pLPC. The plasmids were verified by sequence analysis to confirm the absence of mutations. To generate stable cell pools for STAT1 $\beta$ , PCAF, IL8, CCNC, and the empty vector (pLPC), MDA-MB-435s cells were infected using the supernatant from transiently transfected Phoenix-Ampho packaging cells. Transfection of the Phoenix-Ampho packaging cells was done using FuGENE 6 (Roche) for a period of 48 h. After this time the media were filtered, supplemented with polybrene (4  $\mu$ g/mL), and added to MDA-MB-435s cells. Cells were subjected to two rounds of infection every 12 h. After 24 h from the last infection, cells were trypsinized and selected with puromycin (2.5  $\mu$ g/mL) for 72 h. After selection, cells were analyzed for protein expression by Western blot.

To overexpress LEDGF, MDA-MB-435s cells were transiently transfected with either empty vector (pLPC) or LEDGF using Lipofectamine 2000 (Invitrogen) following the manufacturer's instructions. Cells were analyzed for protein expression by Western blot.

**Xenograft Mouse Model.** Athymic female mice 8–10 wk old were s.c. inoculated with  $10 \times 10^6$  MDA-MB-435s cells. When tumors reached an average of 100 mm<sup>3</sup> in size, mice were randomly assigned to treatment groups and injections of Vivo-Morpholino were administered as described in *SI Morpholino Treatments*. Tumor-bearing mice were assessed for weight loss and tumor volume twice weekly. Tumor volumes were determined by caliper measurement using the following equation: length  $\times$  (width)<sup>2</sup>  $\times$   $\pi/6$ . Four days after the last treatment, mice were killed and tumors were fixed in formalin. All animal studies were conducted in accordance with guidelines approved by the Memorial Sloan-Kettering Cancer Center Institutional Animal Care and Use Committee and the Research Animal Resource Center.

**Statistical Analysis.** The statistical significance of differences for both the morpholino and the siRNA in vitro treatments was calculated using the stratified  $\chi^2$  test (6), and bars represent SEs. For both the

ELISA and MTT assays a paired *t* test was used to establish statistically significant differences and bars represent SD. Differences were considered statistically significant at a *P* value of <0.05.

1. Sambrook J, Russell DW (2001) *Molecular Cloning: A Laboratory Manual* (Cold Spring Harbor Lab, Cold Spring Harbor, NY), 3rd Ed, pp 13.26–13.39.
2. Morcos PA, Li Y, Jiang S (2008) Vivo-Morpholinos: A non-peptide transporter delivers Morpholinos into a wide array of mouse tissues. *Biotechniques* 45:613–614, 616, 618 passim.
3. Pedrazzini L, et al. (2006) Pyridone 6, a pan-Janus-activated kinase inhibitor, induces growth inhibition of multiple myeloma cells. *Cancer Res* 66:9714–9721.

4. Dussault AA, Pouliot M (2006) Rapid and simple comparison of messenger RNA levels using real-time PCR. *Biol Proced Online* 8:1–10.
5. de Stanchina E, et al. (1998) E1A signaling to p53 involves the p19(ARF) tumor suppressor. *Genes Dev* 12:2434–2442.
6. Mantel N, Haenszel W (1959) Statistical aspects of the analysis of data from retrospective studies of disease. *J Natl Cancer Inst* 22:719–748.

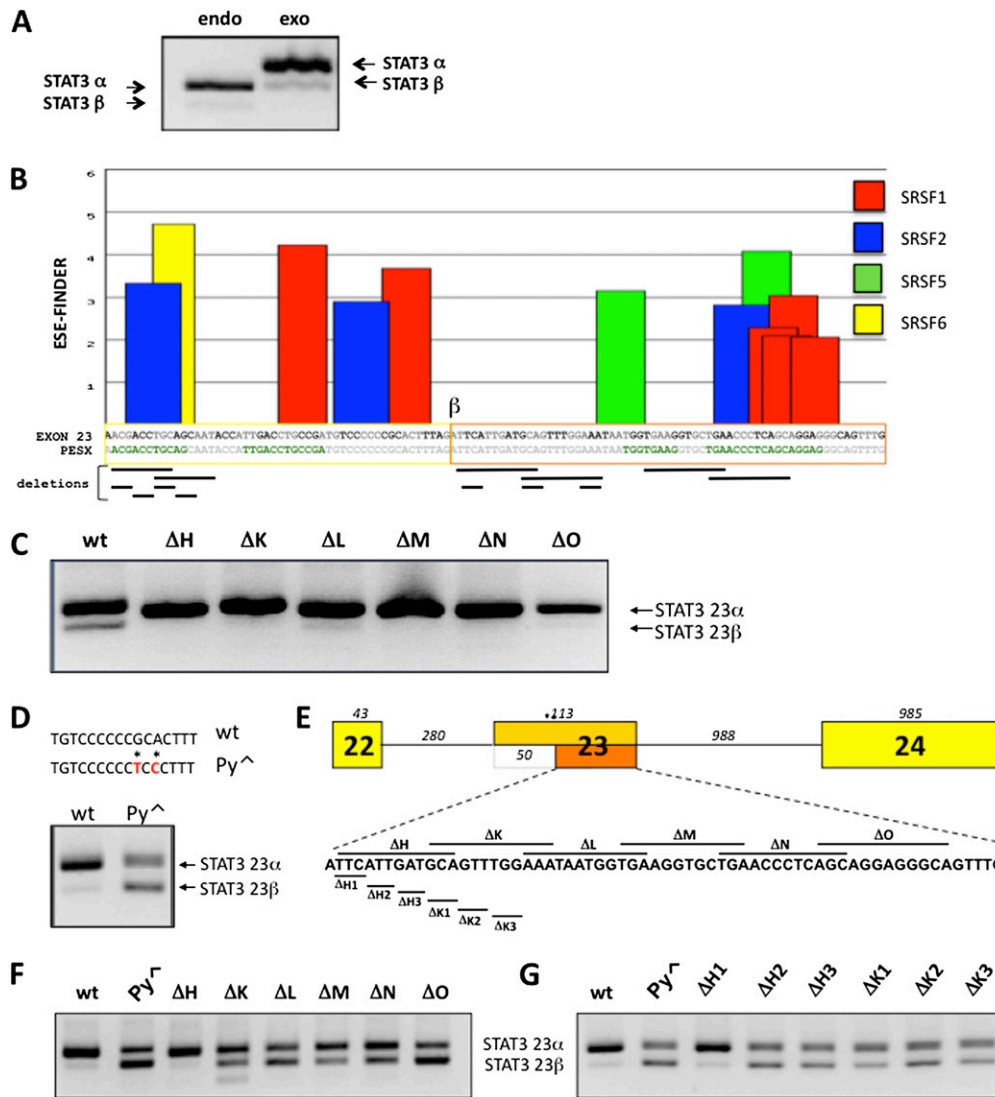

**Fig. S1.** Additional analysis of STAT3 exon 23 *cis*-elements. (A) RT-PCR analysis to assess the splicing pattern of endogenous STAT3 and transfected minigenes in HeLa cells using specific primers. Endo, endogenous; exo, exogenous. (B) Bioinformatic analysis of STAT3 exon 23 sequence using ESEfinder (1) (<http://rulai.cshl.edu/cgi-bin/tools/ESE3/esefinder.cgi?process=home>) and PESX (2) (<http://cubweb.biology.columbia.edu/pesx>) algorithms. The upper graph displays the predicted scores for functional binding of four common serine-arginine (SR) proteins (SRSF1, SRSF2, SRSF5, SRSF6), according to the ESEfinder algorithm, whereas in the PESX analysis, green sequences represent putative exonic splicing enhancers. Black bars at the bottom summarize the position of all deletion mutants (from this work) that had some effect on exon 23 splicing, thus identifying putative splicing regulatory elements in exon 23. Sequences boxed in yellow correspond to the region of exon 23 specific to the  $\alpha$  isoform, whereas sequences boxed in orange correspond to the region of exon 23 common to both  $\alpha$  and  $\beta$  variants. Gray and black in the exon 23 sequence indicate codons in the  $\alpha$  reading frame. (C) RT-PCR analysis of STAT3  $\alpha/\beta$  levels in HeLa cells transfected with the 12-nt ( $\Delta H$ – $\Delta O$ ) exon 23 deletion mutants in STAT3 minigenes. wt, wild-type. (D) (Upper) Partial sequence of the wt and pyrimidine-enhanced ( $Py^\wedge$ ) minigenes. Asterisks indicate the exact position of the mutations. (Lower) RT-PCR analysis of STAT3  $\alpha/\beta$  levels in both transfected minigenes in HeLa cells. (E) (Upper) Diagram of STAT3 minigene. Exon and intron sizes are indicated (nt). (Lower) Lines above and below the exon 23 sequence indicate the exact position of the 12-nt ( $\Delta H$ – $\Delta O$ ) and 3-nt ( $\Delta H1$ – $\Delta K3$ ) deletions generated. (F and G) RT-PCR analysis of STAT3  $\alpha/\beta$  levels in HeLa cells transfected with the 12-nt ( $\Delta H$ – $\Delta O$ ) and 3-nt ( $\Delta H1$ – $\Delta K3$ ) exon 23 deletion mutants, respectively, in the pyrimidine-enhanced minigenes.  $Py^\wedge$ , pyrimidine-enhanced.

- Cartegni L, Wang J, Zhu Z, Zhang MQ, Krainer AR (2003) ESEfinder: A web resource to identify exonic splicing enhancers. *Nucleic Acids Res* 31:3568–3571.
- Zhang XH, Chasin LA (2004) Computational definition of sequence motifs governing constitutive exon splicing. *Genes Dev* 18:1241–1250.

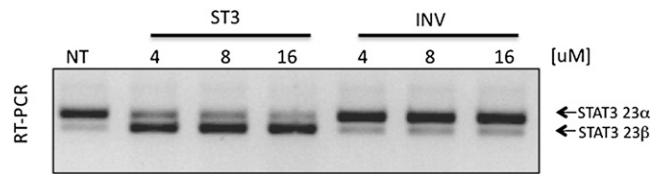

**Fig. S2.** Specificity of morpholino treatment. RT-PCR analysis of STAT3 $\alpha/\beta$  levels in human chronic myelogenous leukemia cell line K562, treated with increasing amount of ST3 and control INV compounds for 4 d at the indicated concentrations. NT, untreated.

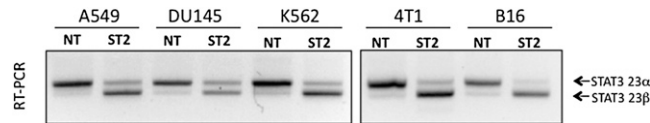

**Fig. S3.** Morpholino treatment of multiple cell lines. RT-PCR analysis of STAT3 $\alpha/\beta$  levels in human lung cancer cell line A549, human prostate cancer cell line DU145, human chronic myelogenous leukemia cell line K562, mouse breast cancer cell line 4T1, and mouse melanoma cell line B16 treated with 16  $\mu$ M ST2 for 4 d.

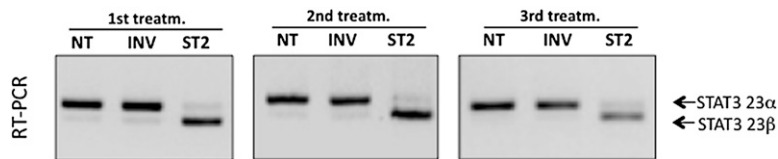

**Fig. S4.** Sustainable splicing switch by ST2 treatment. RT-PCR analysis of STAT3  $\alpha/\beta$  levels in MDA-MB-435s cells treated with either INV or ST2 morpholino oligonucleotide for three consecutive treatments of 4 d each.

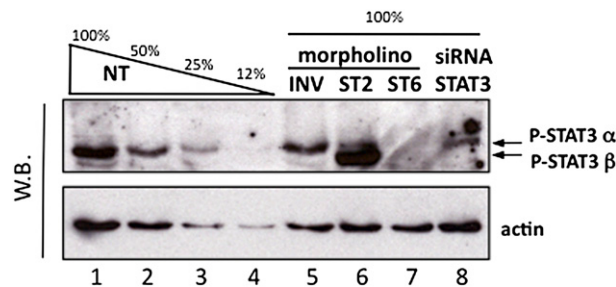

**Fig. S5.** Side-by-side comparison of forced splicing-dependent nonsense-mediated decay and siRNA effectiveness to knock down STAT3. Western blot (W.B.) of phospho-STAT3 Y705 levels in lysates from treated MDA-MB-435s cells. Lanes 1–4 are a serial dilution of untreated cells (NT) from 100 to 12.5% of input. Lanes 5–7 are 100% of input from cells treated with 16  $\mu$ M INV/ST2/ST6 oligos. Lane 8 is 100% of input from cells treated for 48 h with 100 nM siRNA oligo against STAT3. Actin was used as loading control.

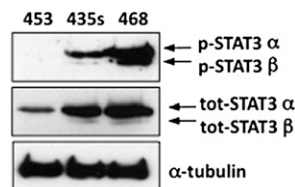

**Fig. S6.** STAT3 Y705 phosphorylation status in different cell lines. Western blot analysis of phospho-STAT3 Y705 and total levels in lysates from MDA-MB-453, MDA-MB-435s, and MDA-MB-468 cells.  $\alpha$ -Tubulin was used as loading control.

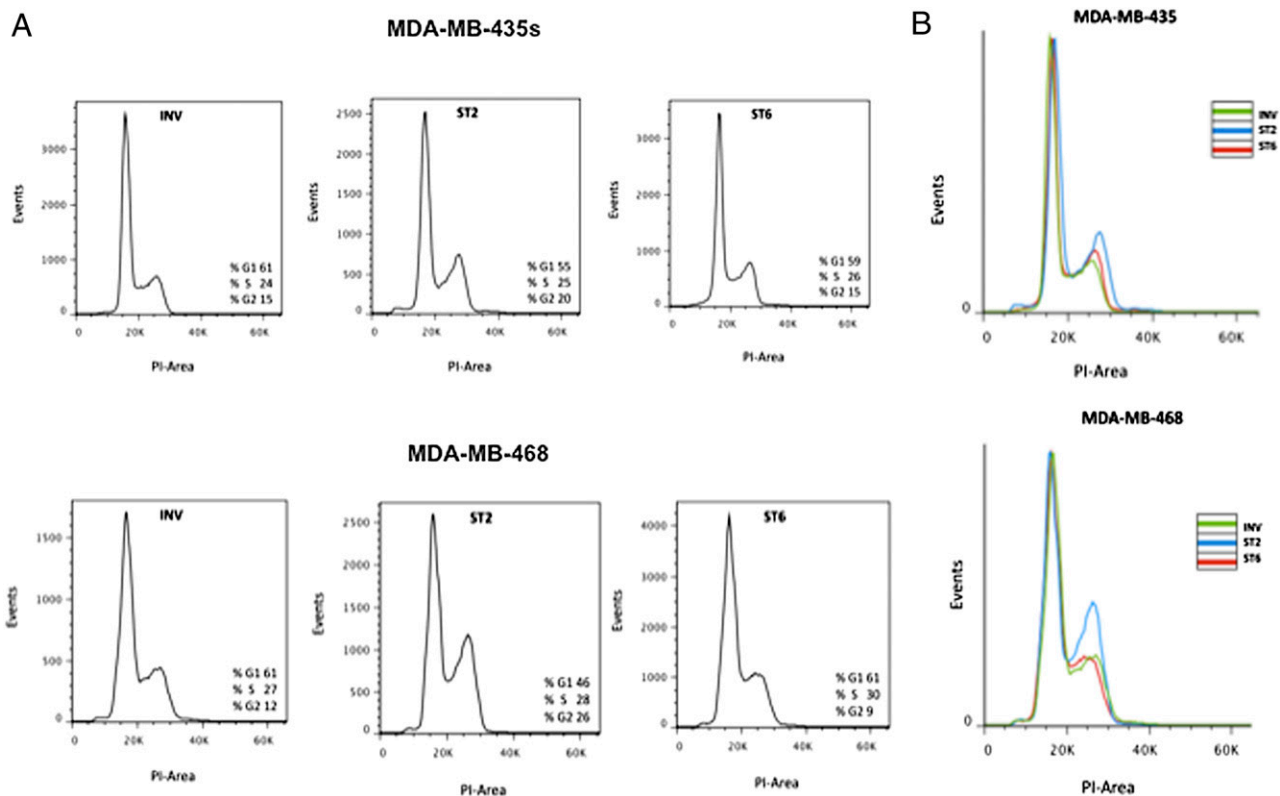

**Fig. S7.** ST2 but not ST6 treatment inhibits cell-cycle progression in MDA-MB-435s and MDA-MB-468 cells. The effect of ST2 or ST6 vivo-morpholino oligonucleotides on the cell cycle was evaluated by flow cytometric analysis. After 60 h of treatment, MDA-MB-435s cells treated with ST2 displayed an increase in the G2/M population ( $20.8\% \pm 0.28$  SE) compared with the INV- ( $14\% \pm 1.4$  SE) and ST6-treated cells ( $12.5\% \pm 3.5$  SE). Similarly, in MDA-MB-468 cells, the G2/M population increased to  $25\% \pm 1.4$  SE following treatment with ST2 (INV:  $9\% \pm 4.24$  SE; ST6:  $12\% \pm 0.7$  SE). The observed increase of the cell-cycle population at the G2/M phase was accompanied by a decrease of cell population in the G1 phase of the cell cycle. All treatments were done at  $4 \mu\text{M}$ , and the treatment was only for 60 h to ensure the cells were in exponential growth. (A) Representative profiles of the analysis of cell-cycle progression. MDA-MB-435s and MDA-MB-468 cells were treated with  $4 \mu\text{M}$  INV, ST2, or ST6 for 60 h. The distribution and percentage of cells in the G1, S, and G2/M phase of the cell cycle are indicated. (B) Overlay of the cell-cycle profiles with ST2 treatment, associated with the increase in the G2/M population, showed in blue. ST6 is in red and control (INV) is in green.

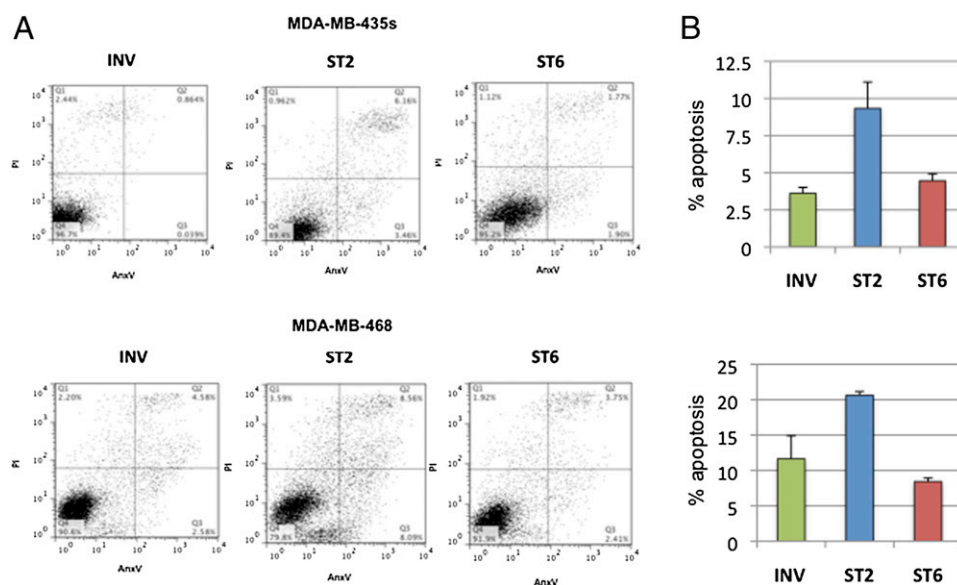

**Fig. S8.** ST2 but not ST6 treatment induces apoptosis in MDA-MB-435s and MDA-MB-468 cells. The effect of ST2 and ST6 treatment on apoptosis was evaluated with annexin V staining. After 60 h of treatment at  $4 \mu\text{M}$ , an increase in the levels of apoptosis was observed in the MDA-MB-435s ( $9.33\%$  apoptotic;  $\pm 1.76$  SE) and MDA-MB-468 cells ( $20.6\%$  apoptotic;  $\pm 0.5$  SE), following ST2 treatment. (A) Representative scatter plot of flow analysis of MDA-MB-435s and MDA-MB-468 cells following treatment with INV, ST2, or ST6 at  $4 \mu\text{M}$  for 60 h. Cells ( $1 \times 10^5$ ) (including supernatant) were harvested and analyzed by AnxV/PI as detailed in *SI Materials and Methods* and data were analyzed with FlowJo software. The percentage of apoptotic cells is indicated. (B) Assessment of apoptotic population, as determined by AnxV/PI staining, in MDA-MB-435s and MDA-MB-468 cells treated with INV, ST2, or ST6 vivo-morpholinos (error bars indicate SE).

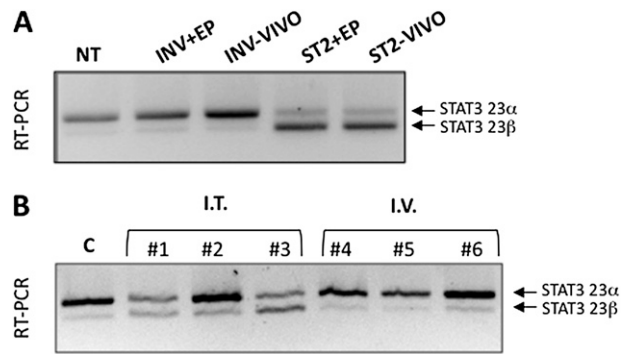

**Fig. 59.** Effectiveness of Vivo-Morpholino oligonucleotide treatment. (A) Side-by-side comparison of naked morpholinos and Vivo-Morpholino efficacy. RT-PCR analysis of STAT3 $\alpha/\beta$  levels in MDA-MB-435s cells treated with either INV or ST2 morpholino plus Endo-Porter or with either INV or ST2 Vivo-Morpholino. All oligos were used at a final concentration of 16  $\mu$ M for 4 d. EP, Endo-Porter. (B) Delivery of Vivo-Morpholino in a xenograft tumor model. RT-PCR analysis of STAT3 $\alpha/\beta$  levels in intratumorally (IT) or intravenously (IV) treated xenograft tumors. MDA-MB-435s cells ( $10 \times 10^6$ ) were s.c. inoculated in the flanks of female athymic mice. When tumors reached  $\sim 100$  mm<sup>3</sup> in volume size, mice ( $n = 3$  per group) were randomly assigned to one of four treatment groups (Control-IV, ST2-IV, Control-IT, and ST2-IT). Animals were treated twice in 1 wk and, 4 d after the second treatment, tumors were collected and further analyzed. C, control. When similar experiments were attempted with MDA-MB-468 cells under comparable conditions (multiple times), the growth of the resulting tumors was unpredictable, with a high fraction of injections that did not take, whereas the ones that grew did so at very irregular rates, and in some cases the tumor grew but was highly necrotic (regardless of treatment).

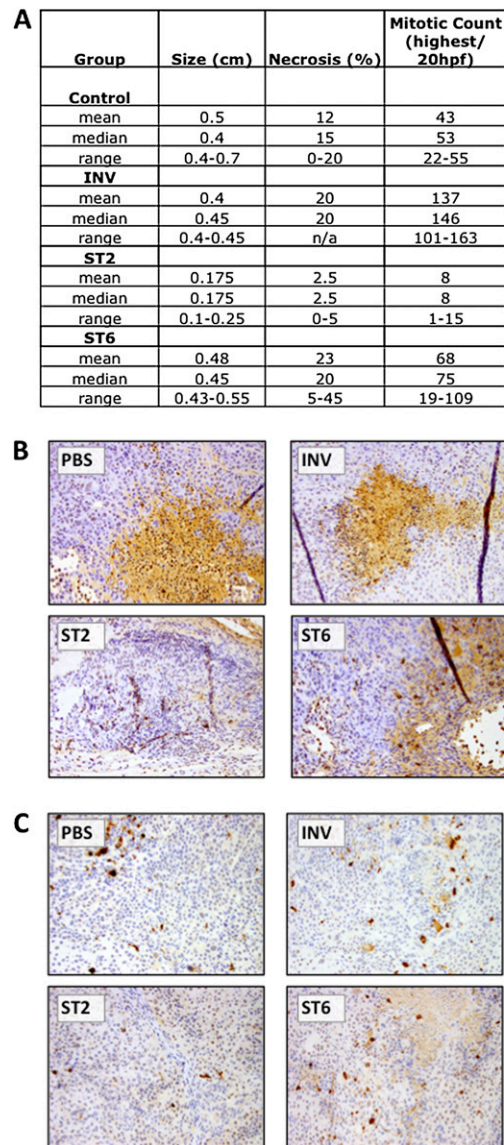

**Fig. S10.** Histopathological analysis of Vivo-Morpholino-treated tumors. (A) Table summarizing the histopathological examination of PBS-, INV-, ST2-, and ST6-treated tumors such as their size (cm), estimated area of necrosis (%), and highest mitotic count per 20 high-power fields (hpf). (B) Representative results of the TUNEL staining of tumor sections from each of the four treated groups (40× magnification). (C) Representative results of the caspase 3 immunohistochemical staining of tumor sections from each of the four treated groups (40× magnification).

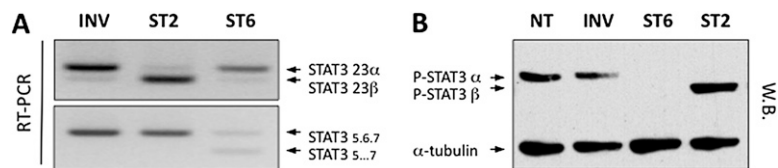

**Fig. S11.** Validation of treatment efficacy of the samples used for qPCR/microarray analysis. (A) (Upper) RT-PCR analysis of STAT3  $\alpha/\beta$  levels in MDA-MB-435s cells treated with 16  $\mu\text{M}$  INV, ST2, or ST6 oligos for 4 d. (Lower) RT-PCR analysis of STAT3 exon 6 skipping in MDA-MB-435s cells treated with 16  $\mu\text{M}$  INV, ST2, or ST6 oligos for 4 d. (B) Western blot analysis of phospho-STAT3 Y705  $\alpha/\beta$  levels in MDA-MB-435s cells treated with 16  $\mu\text{M}$  INV, ST6, or ST2 for 4 d.  $\alpha$ -Tubulin was used as loading control.



### A. ST2 compared to INV

| Gene Name   | Fold Change | Genbank   | Gene Symbol | Description                                                        |
|-------------|-------------|-----------|-------------|--------------------------------------------------------------------|
| 218972 at   | 3.667       | NM_018259 | TTC17       | tetratricopeptide repeat domain 17                                 |
| 204565 at   | 2.614       | NM_018473 | THEM2       | thioesterase superfamily member 2                                  |
| 218104 at   | 2.579       | NM_017746 | TEX10       | testis expressed sequence 10                                       |
| 201157 s at | 2.547       | AF020500  | NMT1        | N-myristoyltransferase 1                                           |
| 201158 at   | 2.484       | AI570834  | NMT1        | N-myristoyltransferase 1                                           |
| 220264 s at | 2.326       | NM_020960 | GPR107      | G protein-coupled receptor 107                                     |
| 204809 at   | 2.309       | NM_006660 | CLPX        | CipX caseinolytic peptidase X homolog (E. coli)                    |
| 214358 at   | 2.288       | AW188201  | ACACA       | acetyl-Coenzyme A carboxylase alpha                                |
| 209422 at   | 2.166       | AY027523  | PHF20       | PHD finger protein 20                                              |
| 211506 s at | 0.34305556  | AF043337  | IL8         | interleukin 8                                                      |
| 201278 at   | 0.335416667 | N21202    | DAB2        | Disabled homolog 2, mitogen-responsive phosphoprotein (Drosophila) |
| 222118 at   | 0.31597222  | AK023669  | BM039       | uncharacterized bone marrow protein BM039                          |
| 203845 at   | 0.30625     | AV727449  | PCAF        | p300/CBP-associated factor                                         |
| 222156 x at | 0.286111111 | AK022459  | CCPG1       | cell cycle progression 1                                           |
| 203167 at   | 0.25625     | NM_003255 | TIMP2       | TIMP metalloproteinase inhibitor 2                                 |
| 209337 at   | 0.23125     | AF063020  | PSIP1       | PC4 and SFRS1 interacting protein 1                                |
| 201955 at   | 0.217361111 | AL137784  | CCNC        | cyclin C                                                           |
| 205961 s at | 0.19305556  | NM_004682 | PSIP1       | PC4 and SFRS1 interacting protein 1                                |
| 209969 s at | 0.184027778 | BC002704  | STAT1       | signal transducer and activator of transcription 1, 91kDa          |
| 204873 at   | 0.132638889 | NM_000466 | PEX1        | peroxisome biogenesis factor 1                                     |

### B. ST6 compared to INV

| Gene Name   | Fold Change | Genbank   | Gene Symbol | Description                                        |
|-------------|-------------|-----------|-------------|----------------------------------------------------|
| 218972 at   | 4.348       | NM_018259 | TTC17       | tetratricopeptide repeat domain 17                 |
| 218104 at   | 2.573       | NM_017746 | TEX10       | testis expressed sequence 10                       |
| 204809 at   | 2.05        | NM_006660 | CLPX        | CipX caseinolytic peptidase X homolog (E. coli)    |
| 201157 s at | 2.391       | AF020500  | NMT1        | N-myristoyltransferase 1                           |
| 201158 at   | 2.388       | AI570834  | NMT1        | N-myristoyltransferase 1                           |
| 209422 at   | 2.221       | AY027523  | PHF20       | PHD finger protein 20                              |
| 204565 at   | 2.164       | NM_018473 | THEM2       | thioesterase superfamily member 2                  |
| 203167 at   | 0.308333333 | NM_003255 | TIMP2       | TIMP metalloproteinase inhibitor 2                 |
| 203973 s at | 0.296527778 | M83667    | CEBPD       | CCAAT/enhancer binding protein (C/EBP), delta      |
| 202238 s at | 0.277083333 | NM_006169 | NNMT        | nicotinamide N-methyltransferase                   |
| 202237 at   | 0.275       | NM_006169 | NNMT        | nicotinamide N-methyltransferase                   |
| 208992 s at | 0.15        | BC000627  | STAT3       | signal transducer and activator of transcription 3 |
| 208991 at   | 0.071527778 | BC000627  | STAT3       | signal transducer and activator of transcription 3 |

Fig. S12. Microarray data from treated MDA-MB-435s cells. (A) Table representing significantly differentially expressed genes (fold change  $\geq 2$ ) filtered from the microarray dataset obtained by comparing ST2-treated versus INV-treated MDA-MB-435s cells. In red are up-regulated genes; in blue are down-regulated genes. (B) Table representing significantly differentially expressed genes (fold change  $\geq 2$ ) filtered from the microarray dataset obtained by comparing ST6-treated versus INV-treated MDA-MB-435s cells. In red are up-regulated genes; in blue are down-regulated genes.

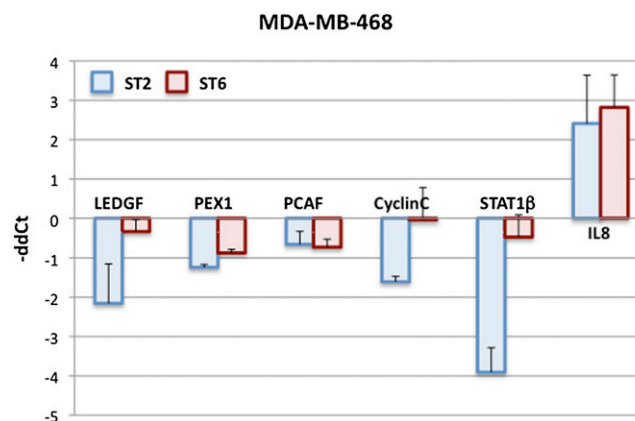

Fig. S13. Validation of STAT3 $\beta$ 's transcriptional signature in the MDA-MB-468 cell line. cDNAs from MDA-MB-468 cells treated with 16  $\mu$ M ST2, ST6, or INV morpholinos for 4 d were analyzed by real-time PCR to validate STAT3 $\beta$ 's transcriptional signature previously identified in MDA-MB-435s cells. Results are represented as a comparison between ST2 and INV treatments (blue) or between ST6 and INV treatments (red) and are expressed as  $-\text{ddCt}(t)$  values after normalization to HPRT expression levels. Data represent the average of at least three independent experiments. Bars represent SD.

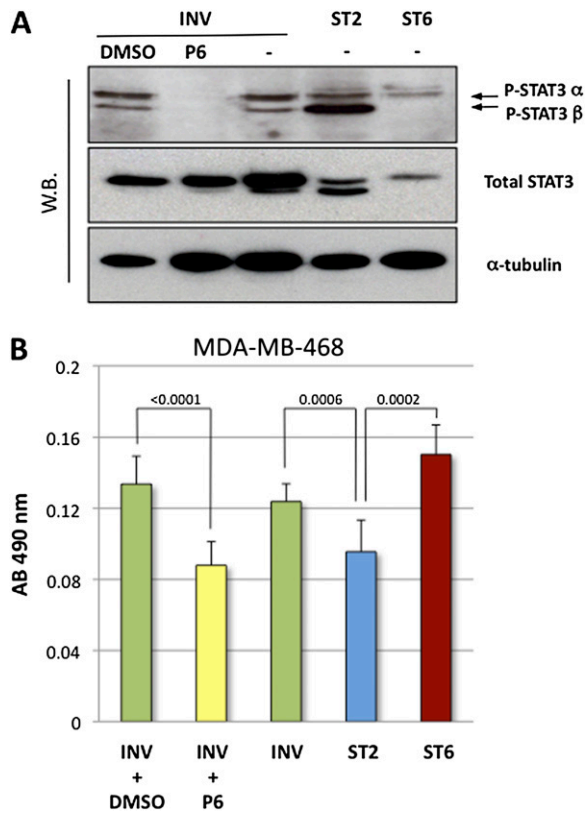

**Fig. S14.** Comparison of (P6) pan-JAK inhibitor with ST6 down-regulation of STAT3 in the MDA-MB-468 cell line. (A) MDA-MB-468 cells were treated for 48 h with 1  $\mu$ M pan-JAK inhibitor tetracyclic pyridone 6 (P6) or DMSO in combination with morpholino control treatment (INV), total STAT3 knockdown morpholino treatment (ST6), or STAT3  $\alpha/\beta$  splicing switch treatment (ST2) as indicated. All *in vivo*-morpholinos were used at 6  $\mu$ M. P6 was used in combination with INV to control for the baseline toxicity associated with morpholino treatment in MDA-MB-468 cells. However, the relative increase in cell death due to P6 versus DMSO is the same whether INV is present or not. Activation status of STAT3 and the effectiveness of treatment were monitored using an antibody against Y705 (*Top*), and total STAT3 levels were also determined by Western blot (*Middle*). Tubulin was used as loading control. (B) The effect of the various treatments on cell growth was measured using the MTT assay. Data represent the average of at least five independent experiments. Bars represent SD. Indicated *P* values were calculated by two-tailed Student's *t* test. The results indicate that lack of phospho-STAT3 is not sufficient, per se, to inhibit growth even in cells described as highly sensitive to its depletion such as MDA-MB-468. Rather, another event must occur, such as the induction of STAT3 $\beta$  or the presumable inactivation of additional JAK substrates by pan-Jak inhibitor P6.
